# Supplementary material for: Substitution matters: isolating phosphorus diiminopyridine complexes
Source: Royal Society of Chemistry journal article supplement (doi:10.1039/c1dt11111f), 2011-01-01
Supplement: c1dt11111f.pdf [file c1dt11111f.pdf]

Supporting Information to:

# Substitution Matters: Isolating Phosphorus Diiminopyridine Complexes

Caleb D. Martin and Paul J. Ragona

*The University of Western Ontario Department of Chemistry 1151 Richmond St., London,  
ON, N6A 5B7 (Canada)*

## Table of Contents

|                                                                          |   |
|--------------------------------------------------------------------------|---|
| Figure S1: Packing diagram of <b>2P[I<sub>3</sub>]</b> .                 | 2 |
| Figure S2: Packing diagram of <b>3P[I<sub>3</sub>]</b> .                 | 2 |
| Figure S3: Packing diagram of <b>2P[B<sub>12</sub>Cl<sub>12</sub>]</b> . | 3 |
| Figure S4: Fig. S4: Packing diagram of <b>2P[Br]</b> .                   | 3 |

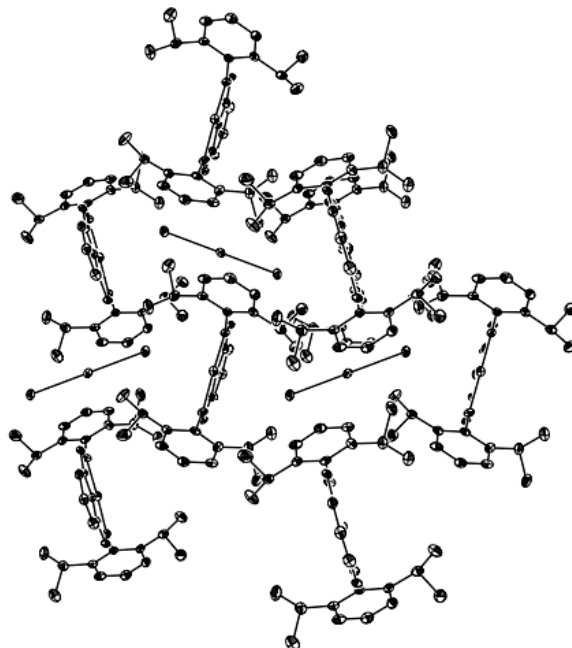

Fig. S1: Packing diagram of **2P**[I<sub>3</sub>]. Thermal ellipsoids are drawn to the 30% probability level. Hydrogen atoms and solvates are removed for clarity.

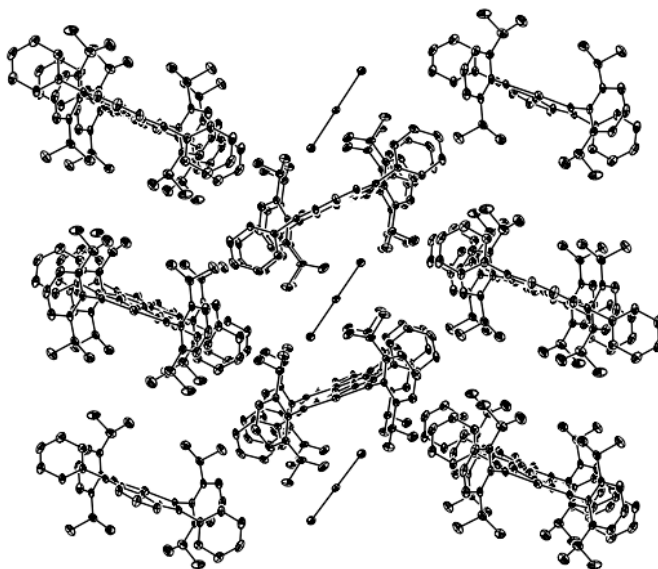

Fig. S2: Packing diagram of **3P**[I<sub>3</sub>]. Thermal ellipsoids are drawn to the 30% probability level. Hydrogen atoms are removed for clarity.

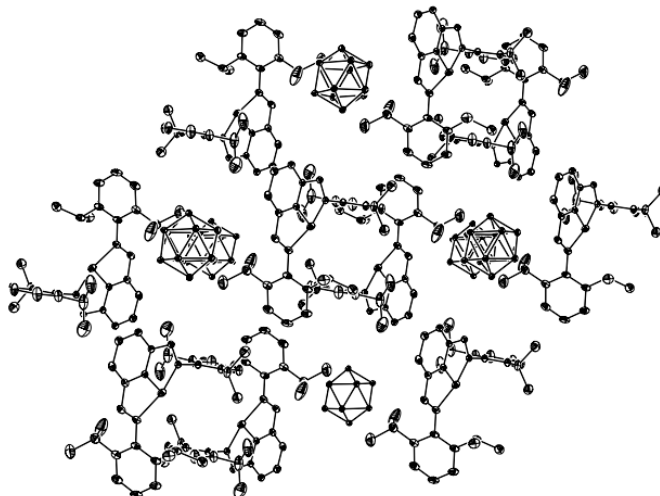

Fig. S3: Packing diagram of **2P[B<sub>12</sub>Cl<sub>12</sub>]**. Thermal ellipsoids are drawn to the 30% probability level. Hydrogen atoms and chloride atoms on the anion are removed for clarity.

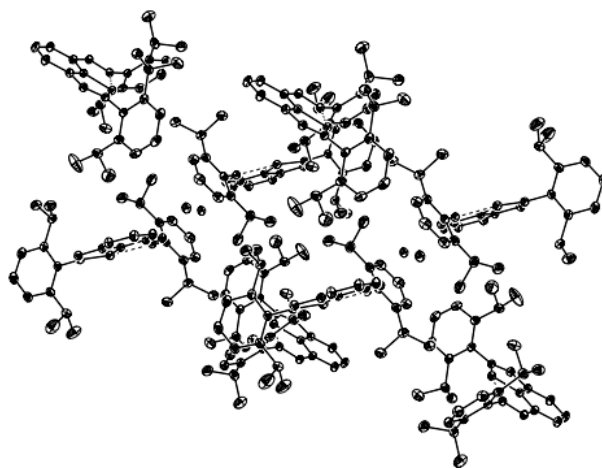

Fig. S4: Packing diagram of **2P[Br]**. Thermal ellipsoids are drawn to the 30% probability level. Hydrogen atoms and solvates are removed for clarity.
